# Supplementary material for: In Arabidopsis thaliana, RNA-Induced Silencing Complex-Loading of MicroRNAs Plays a Minor Regulatory Role During Photomorphogenesis Except for miR163
Source: Front Plant Sci. 2022 Jul 13;13:854869. doi: 10.3389/fpls.2022.854869 (PMC9326452; doi:10.3389/fpls.2022.854869)
Supplement: Supplementary Table 1 — (A) Shows miRNAs identified by RNA-seq in all samples. We presented four replicate samples from each condition (RISC light sample replicates 1–4, RISC dark sample replicates 1–4, Input light sample replicates 1–4, and Input dark sample replicates 1–4). (B) Contains the list of miRNAs that were applied for analyses in our study. (C) Shows miRNA that was excluded from the analyses including miRNA*s. (D) Contains duplicated miRNAs. (E) displays those miRNAs that were excluded based on low abundance. [file Table_1.xlsx]

## Sheet: all miRNAs
MIR ID	mir/precursor	MI ID2	LL1	LL2	LL3	LL4	LL5	LL6	LL7	LL8	LL9	LL10	LL11	LL12	LL13	LL14	LL15	LL16
ath-miR156b-3p	miRNA	MIMAT0031866	146.388	262.578	267.99	232.36	225.973	230.226	315.657	181.408	563.68	936.87	376.719	611.923	467.444	591.85	546.643	734.042
ath-miR156b-5p*	miRNA	MIMAT0000167	9.08615	20.0117	14.1793	14.1436	27.6701	7.06214	19.8839	18.6744	9.45092	15.3886	18.1551	17.5408	14.9935	20.2424	5.24358	27.1868
ath-miR156f-3p	miRNA	MIMAT0031869	70.6701	84.2917	104.927	115.17	181.393	298.022	169.013	200.972	153.24	301.176	173.381	273.135	291.932	942.236	149.442	526.144
ath-miR156f-5p	miRNA	MIMAT0000171	0	0	0	0	6.14892	1.41243	0	1.77851	0.675065	2.56476	1.81551	0.501166	0	1.44589	1.3109	0
ath-miR157b-3p*	miRNA	MIMAT0031871	49.469	45.4811	31.1945	34.3488	16.9095	18.3616	47.2243	26.6776	282.177	407.43	336.778	539.254	203.735	2199.68	184.836	305.451
ath-miR157b-5p	miRNA	MIMAT0000173	639.059	671.908	667.847	581.91	425.812	459.039	591.546	451.742	431.367	720.697	504.712	460.571	343.968	514.736	292.33	316.646
ath-miR158b	miRNA	MIMAT0001014	196.867	311.697	277.915	341.468	178.319	197.74	345.483	527.328	212.646	148.756	261.434	197.459	163.164	214.955	302.817	398.206
ath-miR159b-3p	miRNA	MIMAT0000207	3711.19	3874.99	3699.39	3109.58	3956.83	4692.09	3695.92	6182.99	2043.42	2669.18	1695.69	1855.31	2718.23	2470.06	2444.82	2389.24
ath-miR159b-5p*	miRNA	MIMAT0031889	1.00957	2.42566	2.83587	2.02052	1.53723	1.41243	14.9129	0.889255	28.3527	17.5869	22.6939	24.5571	32.6329	32.2915	30.1506	38.3813
ath-miR159c	miRNA	MIMAT0001015	29.2776	39.417	34.0304	26.2668	9.22337	25.4237	7.45646	50.6875	15.5265	20.5181	5.44654	20.5478	8.8197	16.3867	10.4872	12.7938
ath-miR160a-5p	miRNA	MIMAT0000178	2.01914	8.48981	9.92554	6.06156	6.14892	8.47457	17.3984	10.6711	9.45092	8.06067	1.81551	5.01166	4.40985	4.81962	0	4.79766
ath-miR160b	miRNA	MIMAT0000179	1.00957	7.27698	4.2538	2.02052	9.22337	4.23729	4.97097	7.11404	3.37533	3.66394	1.81551	2.00466	3.52788	2.40981	3.93269	1.59922
ath-miR161.1	miRNA	MIMAT0000181	16208.7	15975.4	21529.9	21096.3	20508.2	17124.3	16468.8	16785.6	11131.2	10387.6	14331.7	13478.8	12265.6	14373.6	10333.8	17170.8
ath-miR161.2	miRNA	MIMAT0006779	16208.7	15975.4	21529.9	21096.3	20508.2	17124.3	16468.8	16785.6	11131.2	10387.6	14330.7	13478.8	12265.6	14373.1	10333.8	17170.8
ath-miR163	miRNA	MIMAT0000184	1168.08	1295.3	1427.86	1416.38	4.61169	18.3616	4.97097	20.4529	288.253	219.47	363.103	363.345	1.76394	8.19336	11.7981	38.3813
ath-miR164b-3p	miRNA	MIMAT0031878	0	0.606415	0	0	0	1.41243	0	0	4.05039	1.09918	0.907756	6.51515	5.29182	4.81962	3.93269	0
ath-miR164b-5p	miRNA	MIMAT0000186	3.02872	1.81924	0	0	1.53723	0	0	0	3.37533	1.46558	0.907756	0	2.64591	0.963924	0	0
ath-miR164c-5p	miRNA	MIMAT0001017	88.8424	83.0788	96.4195	107.088	95.3082	80.5084	39.7678	94.261	56.7055	62.6534	28.1404	39.0909	35.2788	21.6883	27.5288	49.5759
ath-miR166a-3p	miRNA	MIMAT0000189	123.168	182.531	177.242	161.642	153.723	296.61	176.47	227.649	122.187	216.173	95.3144	139.324	228.43	207.726	199.256	182.311
ath-miR167a-3p*	miRNA	MIMAT0031883	4.03829	4.85132	1.41793	6.06156	4.61169	4.23729	2.48549	0	46.5795	82.4387	65.3585	78.1818	26.4591	57.3535	43.2595	15.9922
ath-miR167a-5p	miRNA	MIMAT0000196	10.0957	7.27698	7.08967	0	7.68615	2.82486	9.94195	8.00329	2.0252	4.76312	2.72327	4.51049	1.76394	3.37374	1.3109	3.19844
ath-miR167b	miRNA	MIMAT0000197	11.1053	11.5219	15.5973	4.04104	7.68615	8.47457	2.48549	15.1173	0.675065	8.06067	4.53878	5.01166	3.52788	4.33766	1.3109	4.79766
ath-miR167d	miRNA	MIMAT0000905	768.285	616.118	673.519	583.93	842.402	1118.64	708.364	1124.91	198.469	298.245	265.065	246.573	475.382	325.324	487.653	308.65
ath-miR168a-3p*	miRNA	MIMAT0031884	3.02872	9.70264	4.2538	14.1436	4.61169	2.82486	7.45646	6.22478	61.431	101.125	105.3	125.291	68.7937	108.441	76.0319	110.346
ath-miR168a-5p	miRNA	MIMAT0000198	831.888	946.007	811.058	818.311	528.807	618.644	502.068	753.199	1290.73	1516.87	1033.03	1343.62	1312.37	1746.15	1225.69	1221.8
ath-miR169b-3p	miRNA	MIMAT0031897	1.00957	0.606415	2.83587	6.06156	0	2.82486	0	4.44627	2.70026	4.03034	3.63103	5.51282	5.29182	6.74747	3.93269	0
ath-miR169b-5p	miRNA	MIMAT0000906	37.3542	107.942	51.0456	80.8208	75.3242	74.8587	86.992	73.8082	10.801	15.7549	20.8784	38.5897	23.8132	104.586	19.6634	31.9844
ath-miR169e	miRNA	MIMAT0000909	1.00957	16.3732	11.3435	6.06156	0	2.82486	0	6.22478	0	0.366394	2.72327	0.501166	0.88197	1.92785	0	3.19844
ath-miR171a-5p	miRNA	MIMAT0031888	42.402	25.4694	34.0304	28.2873	46.1169	52.2599	32.3113	40.0165	43.2042	72.9124	61.7274	57.634	53.8002	49.6421	58.9903	73.5642
ath-miR172e-5p	miRNA	MIMAT0031918	0	0	1.41793	2.02052	1.53723	0	2.48549	0	3.37533	4.03034	4.53878	6.51515	1.76394	42.8946	5.24358	3.19844
ath-miR173-3p	miRNA	MIMAT0022843	78.7466	50.3324	53.8815	32.3283	47.6541	125.706	57.1662	67.5834	51.98	68.1493	47.2033	62.6457	100.545	49.1601	107.493	59.1712
ath-miR173-5p	miRNA	MIMAT0000206	109.034	75.8019	87.9119	56.5746	86.0848	101.695	106.876	92.4825	25.6525	27.1132	49.9266	46.6084	47.6264	56.8715	36.7051	30.3852
ath-miR1886.1	miRNA	MIMAT0007853	81.7754	63.0672	92.1657	141.436	75.3242	70.6214	114.332	67.5834	98.5596	83.5379	118.916	111.76	67.0297	57.8355	60.3012	67.1673
ath-miR1886.2	miRNA	MIMAT0012129	81.7754	63.0672	92.1657	141.436	75.3242	70.6214	114.332	67.5834	98.5596	83.5379	118.916	111.76	67.0297	57.8355	60.3012	67.1673
ath-miR1886.3	miRNA	MIMAT0013773	1.00957	3.03207	1.41793	0	3.07446	7.06214	7.45646	2.66776	0	0.366394	1.81551	1.5035	0.88197	1.44589	0	1.59922
ath-miR1888a	miRNA	MIMAT0007855	7.06701	4.85132	1.41793	0	6.14892	7.06214	4.97097	1.77851	2.0252	4.03034	0	4.00932	1.76394	1.92785	3.93269	11.1945
ath-miR1888b	miRNA	MIMAT0022436	3.02872	1.81924	0	0	1.53723	0	0	0	2.0252	0.366394	0.907756	3.50816	1.76394	0.481962	0	1.59922
ath-miR319a	miRNA	MIMAT0000511	755.16	941.762	689.116	836.495	1136.01	1524.01	1205.46	1483.28	341.583	457.626	308.637	405.443	646.484	1063.21	722.303	607.704
ath-miR319c	miRNA	MIMAT0001016	157.493	167.371	141.793	185.888	190.616	218.926	136.702	221.424	31.053	47.6312	52.6499	50.1166	58.21	64.5829	79.9646	47.9766
ath-miR3440b-3p	miRNA	MIMAT0017946	1.00957	0	0	4.04104	0	1.41243	0	0	0	3.29755	0	1.5035	0.88197	0.481962	1.3109	0
ath-miR390a-3p	miRNA	MIMAT0031902	0	1.81924	0	0	0	2.82486	0	2.66776	1.35013	2.19836	2.72327	3.50816	1.76394	9.15728	7.86537	1.59922
ath-miR390a-5p	miRNA	MIMAT0000931	0	1.21283	4.2538	6.06156	1.53723	0	2.48549	3.55702	0	1.83197	0	0.501166	2.64591	2.40981	0	4.79766
ath-miR390b-3p	miRNA	MIMAT0031903	2.01914	0.606415	0	0	4.61169	1.41243	7.45646	1.77851	0	0.366394	0.907756	0.501166	1.76394	13.9769	6.55448	7.9961
ath-miR391-5p	miRNA	MIMAT0000933	2.01914	3.63849	2.83587	4.04104	0	1.41243	2.48549	1.77851	1.35013	1.09918	0	1.00233	1.76394	0.481962	1.3109	1.59922
ath-miR393a-3p*	miRNA	MIMAT0031905	20.1914	14.554	19.8511	20.2052	6.14892	19.774	12.4274	21.3421	24.3024	15.0222	24.5094	23.5548	34.3968	35.1832	60.3012	25.5875
ath-miR393b-3p*	miRNA	MIMAT0031906	21.201	25.4694	15.5973	28.2873	15.3723	33.8983	24.8549	41.795	42.5291	39.2042	33.587	24.0559	53.8002	62.6551	69.4775	25.5875
ath-miR396b-3p*	miRNA	MIMAT0031909	21.201	10.9155	11.3435	8.08208	16.9095	14.1243	9.94195	21.3421	8.77585	12.091	14.5241	15.5361	22.9312	28.4358	18.3525	35.1829
ath-miR396b-5p	miRNA	MIMAT0000945	1879.82	2240.7	2281.46	2374.11	1867.73	1807.91	1782.09	1775.84	2593.6	3333.82	2809.51	3436.49	3197.14	2809.84	2052.86	1807.12
ath-miR397a*	miRNA	MIMAT0000946	13.1244	6.06415	5.67174	12.1231	12.2978	11.2994	14.9129	10.6711	4.72546	2.19836	3.63103	5.01166	15.8755	6.26551	13.109	9.59533
ath-miR399a	miRNA	MIMAT0000951	1.00957	1.21283	4.2538	0	0	0	0	0	0.675065	1.83197	0.907756	1.5035	0	0.481962	0	0
ath-miR399c-3p	miRNA	MIMAT0000953	36.3446	54.5773	55.2994	60.6156	38.4307	32.4859	24.8549	32.0132	57.3806	63.0198	88.9601	73.1702	40.5706	40.4848	39.3269	41.5797
ath-miR399c-5p*	miRNA	MIMAT0031913	0	3.03207	1.41793	8.08208	0	0	0	0.889255	89.1086	106.254	29.0482	59.1375	29.105	16.3867	17.0416	11.1945
ath-miR399f	miRNA	MIMAT0000956	4.03829	9.09622	15.5973	8.08208	0	2.82486	0	0	54.0052	24.182	30.8637	34.0793	0	0.963924	0	6.39688
ath-miR402	miRNA	MIMAT0001003	8.07658	3.03207	4.2538	8.08208	6.14892	4.23729	9.94195	7.11404	1.35013	0.366394	0	0.501166	0	1.92785	0	1.59922
ath-miR403-3p	miRNA	MIMAT0001004	1980.78	1825.31	1802.19	1798.26	2310.46	1786.72	2714.15	1769.62	1261.02	1234.75	1847.28	1567.14	1634.29	1633.85	1961.1	1773.54
ath-miR403-5p*	miRNA	MIMAT0031914	16.1532	16.3732	18.4331	14.1436	13.8351	9.887	27.3404	10.6711	14.8514	11.3582	15.4319	15.035	9.70167	20.2424	9.17627	4.79766
ath-miR408-3p	miRNA	MIMAT0001011	3.02872	5.45773	9.92554	8.08208	13.8351	16.9491	19.8839	8.89255	1.35013	2.56476	5.44654	3.00699	23.8132	7.22943	14.4198	11.1945
ath-miR408-5p	miRNA	MIMAT0031915	262.489	226.799	309.11	323.283	590.296	788.135	685.994	459.745	178.892	200.784	210.599	147.343	422.464	375.93	474.544	676.47
ath-miR4228-3p	miRNA	MIMAT0032109	2.01914	4.2449	4.2538	2.02052	3.07446	2.82486	2.48549	4.44627	8.10079	9.15985	6.35429	4.51049	12.3476	10.6032	9.17627	9.59533
ath-miR4228-5p	miRNA	MIMAT0017944	1.00957	0.606415	0	2.02052	0	0	2.48549	0	0.675065	1.46558	1.81551	4.00932	0.88197	2.89177	0	0
ath-miR5024-5p	miRNA	MIMAT0020530	2.01914	3.03207	4.2538	4.04104	3.07446	2.82486	2.48549	0	0.675065	2.56476	3.63103	2.50583	0.88197	2.89177	2.62179	0
ath-miR5026	miRNA	MIMAT0020532	3.02872	0	0	0	0	0	0	0	0	4.03034	2.72327	1.5035	1.76394	0.963924	1.3109	3.19844
ath-miR5595a	miRNA	MIMAT0023517	8.07658	4.2449	4.2538	0	7.68615	8.47457	4.97097	2.66776	8.10079	3.66394	9.98532	5.01166	6.17379	4.33766	3.93269	15.9922
ath-miR5644	miRNA	MIMAT0022406	2.01914	0.606415	1.41793	4.04104	4.61169	2.82486	0	1.77851	1.35013	2.19836	0.907756	2.00466	0.88197	0.963924	1.3109	1.59922
ath-miR5650	miRNA	MIMAT0022416	12.1149	15.7668	2.83587	6.06156	4.61169	1.41243	4.97097	3.55702	22.2772	12.8238	11.8008	19.5455	1.76394	5.30158	2.62179	6.39688
ath-miR5651	miRNA	MIMAT0022422	29.2776	19.4053	24.1049	22.2257	10.7606	4.23729	17.3984	10.6711	18.9018	10.259	17.2474	20.0466	14.1115	14.4589	11.7981	11.1945
ath-miR5652	miRNA	MIMAT0022424	2.01914	6.67056	4.2538	4.04104	10.7606	0	4.97097	0.889255	0	4.39673	2.72327	4.00932	1.76394	5.30158	6.55448	0
ath-miR5654-3p	miRNA	MIMAT0023005	33.3159	35.1721	52.4636	64.6566	26.1329	36.7231	29.8258	56.9123	38.4787	36.273	41.7568	30.0699	23.8132	24.5801	27.5288	25.5875
ath-miR5654-5p	miRNA	MIMAT0022426	0	5.45773	1.41793	0	1.53723	2.82486	4.97097	3.55702	0.675065	1.83197	0.907756	1.00233	1.76394	2.89177	0	0
ath-miR5656	miRNA	MIMAT0022429	2.01914	1.21283	1.41793	2.02052	1.53723	8.47457	4.97097	1.77851	1.35013	0.732788	1.81551	2.50583	0	2.89177	5.24358	1.59922
ath-miR5663-3p	miRNA	MIMAT0032129	15.1436	6.67056	9.92554	4.04104	10.7606	7.06214	9.94195	3.55702	14.1764	14.2894	13.6163	12.5291	8.8197	12.0491	10.4872	19.1907
ath-miR5995b	miRNA	MIMAT0023518	2.01914	2.42566	1.41793	4.04104	0	4.23729	2.48549	0	4.05039	0.366394	0.907756	2.50583	1.76394	2.40981	2.62179	4.79766
ath-miR5997	miRNA	MIMAT0023520	0	4.2449	0	2.02052	3.07446	4.23729	0	0	0	0	0	2.00466	2.64591	0.963924	5.24358	3.19844
ath-miR5998a	miRNA	MIMAT0023521	3.02872	0.606415	0	0	0	0	0	0.889255	1.35013	0.732788	3.63103	1.5035	0.88197	0.481962	0	3.19844
ath-miR773a	miRNA	MIMAT0003932	224.125	226.799	218.362	163.662	328.967	396.892	323.113	469.527	128.937	229.729	154.319	163.38	347.496	383.642	289.708	228.689
ath-miR775*	miRNA	MIMAT0003934	3.02872	10.3091	11.3435	10.1026	9.22337	14.1243	4.97097	12.4496	9.45092	4.76312	9.07756	10.0233	18.5214	13.4949	6.55448	4.79766
ath-miR777	miRNA	MIMAT0003936	1.00957	7.88339	1.41793	6.06156	3.07446	7.06214	7.45646	5.33553	0.675065	2.93115	6.35429	4.51049	5.29182	3.37374	0	1.59922
ath-miR779.1	miRNA	MIMAT0003938	2.01914	1.81924	0	4.04104	0	1.41243	2.48549	1.77851	11.4761	10.9918	13.6163	13.0303	4.40985	5.30158	5.24358	9.59533
ath-miR779.2	miRNA	MIMAT0004329	17.1627	13.3411	14.1793	14.1436	15.3723	14.1243	14.9129	10.6711	15.5265	14.6558	19.9706	19.0443	8.8197	8.67532	11.7981	15.9922
ath-miR781a	miRNA	MIMAT0003940	3.02872	9.70264	1.41793	4.04104	0	4.23729	0	7.11404	0	2.93115	0.907756	3.00699	0	0.963924	1.3109	3.19844
ath-miR8176	miRNA	MIMAT0032775	2.01914	1.21283	0	2.02052	0	2.82486	0	1.77851	4.05039	1.46558	3.63103	1.5035	0.88197	4.81962	1.3109	7.9961
ath-miR824-3p	miRNA	MIMAT0032024	0	4.2449	2.83587	6.06156	6.14892	1.41243	2.48549	1.77851	13.5013	20.8845	19.0629	29.5688	14.1115	62.6551	6.55448	30.3852
ath-miR824-5p	miRNA	MIMAT0004277	102.976	95.2071	77.9864	103.047	121.441	112.994	141.673	110.268	23.6273	43.9673	42.6645	56.6317	50.2723	54.9437	36.7051	23.9883
ath-miR825	miRNA	MIMAT0004241	2.01914	1.21283	1.41793	10.1026	3.07446	1.41243	0	0	0.675065	2.56476	3.63103	1.5035	0	0.963924	0	0
ath-miR833a-5p	miRNA	MIMAT0004252	4.03829	6.06415	4.2538	2.02052	0	0	0	0.889255	4.05039	5.49591	4.53878	5.51282	0.88197	0.481962	0	1.59922
ath-miR837-3p	miRNA	MIMAT0004259	23.2202	7.88339	15.5973	16.1642	12.2978	14.1243	7.45646	4.44627	9.45092	19.4189	6.35429	8.01865	7.93773	10.1212	7.86537	6.39688
ath-miR837-5p	miRNA	MIMAT0004258	16.1532	31.5336	39.7022	22.2257	24.5957	14.1243	22.3694	13.3388	35.1034	24.5484	24.5094	35.0816	28.223	26.9899	30.1506	25.5875
ath-miR841b-3p	miRNA	MIMAT0017742	2.01914	1.21283	0	8.08208	3.07446	1.41243	0	0	0.675065	2.19836	2.72327	0	3.52788	3.37374	0	1.59922
ath-miR841b-5p	miRNA	MIMAT0017741	0	0	7.08967	2.02052	0	1.41243	0	0.889255	0.675065	1.83197	2.72327	2.00466	1.76394	0.963924	0	0
ath-miR842	miRNA	MIMAT0004264	20.1914	33.9592	14.1793	22.2257	18.4467	11.2994	27.3404	14.2281	6.07559	6.2287	6.35429	9.02098	14.1115	15.9048	14.4198	14.393
ath-miR843	miRNA	MIMAT0004265	6.05743	3.63849	1.41793	2.02052	6.14892	2.82486	2.48549	1.77851	10.801	8.79346	4.53878	7.01632	7.93773	4.33766	14.4198	9.59533
ath-miR846-3p*	miRNA	MIMAT0004269	10.0957	23.0438	12.7614	30.3078	27.6701	12.7119	47.2243	32.9024	14.1764	13.1902	11.8008	18.5431	24.6952	29.3997	11.7981	22.3891
ath-miR846-5p	miRNA	MIMAT0032023	49.469	32.7464	51.0456	54.554	55.3402	36.7231	54.6807	43.5735	71.5569	36.6394	95.3144	69.662	65.2658	59.2813	123.224	110.346
ath-miR847	miRNA	MIMAT0004278	12.1149	6.67056	2.83587	8.08208	0	2.82486	0	0	4.72546	6.96149	9.07756	6.51515	0	0	0	0
ath-miR850	miRNA	MIMAT0004272	0	0.606415	1.41793	0	0	2.82486	0	1.77851	3.37533	1.46558	5.44654	0.501166	0.88197	0	0	0
ath-miR852	miRNA	MIMAT0004275	1.00957	1.21283	0	0	1.53723	4.23729	4.97097	3.55702	2.70026	3.66394	4.53878	2.50583	0	2.40981	0	0
ath-miR853	miRNA	MIMAT0004276	4.03829	2.42566	4.2538	2.02052	4.61169	1.41243	9.94195	1.77851	4.05039	2.56476	0.907756	0.501166	1.76394	0.481962	3.93269	1.59922
ath-miR858b	miRNA	MIMAT0022417	17.1627	26.6823	15.5973	14.1436	30.7446	9.887	19.8839	22.2314	6.75065	8.06067	3.63103	8.51981	6.17379	24.5801	3.93269	14.393
ath-miR862-5p	miRNA	MIMAT0004307	4.03829	1.21283	1.41793	4.04104	3.07446	2.82486	0	0.889255	3.37533	3.29755	4.53878	6.01399	4.40985	2.40981	2.62179	6.39688
ath-miR863-5p	miRNA	MIMAT0004309	2.01914	1.21283	5.67174	0	10.7606	0	2.48549	2.66776	0	1.46558	0	0	0.88197	0	0	0
ath-miR864-5p	miRNA	MIMAT0004311	5.04786	1.81924	9.92554	12.1231	0	0	4.97097	0	2.0252	1.09918	3.63103	1.5035	0	0.481962	1.3109	0
ath-miR865-3p	miRNA	MIMAT0004314	0	1.81924	0	4.04104	3.07446	5.64971	0	4.44627	2.0252	2.56476	4.53878	2.50583	1.76394	2.40981	1.3109	3.19844
ath-miR865-5p	miRNA	MIMAT0004313	26.2489	21.8309	18.4331	14.1436	18.4467	19.774	9.94195	11.5603	29.7029	22.35	30.8637	26.5618	25.5771	22.6522	49.814	49.5759

## Sheet: analysed miRNAs
MIR ID	mir/precursor	MI ID2	LL1	LL2	LL3	LL4	LL5	LL6	LL7	LL8	LL9	LL10	LL11	LL12	LL13	LL14	LL15	LL16
ath-miR156b-3p	miRNA	MIMAT0031866	146.388	262.578	267.99	232.36	225.973	230.226	315.657	181.408	563.68	936.87	376.719	611.923	467.444	591.85	546.643	734.042
ath-miR156f-3p	miRNA	MIMAT0031869	70.6701	84.2917	104.927	115.17	181.393	298.022	169.013	200.972	153.24	301.176	173.381	273.135	291.932	942.236	149.442	526.144
ath-miR157b-5p	miRNA	MIMAT0000173	639.059	671.908	667.847	581.91	425.812	459.039	591.546	451.742	431.367	720.697	504.712	460.571	343.968	514.736	292.33	316.646
ath-miR158b	miRNA	MIMAT0001014	196.867	311.697	277.915	341.468	178.319	197.74	345.483	527.328	212.646	148.756	261.434	197.459	163.164	214.955	302.817	398.206
ath-miR159b-3p	miRNA	MIMAT0000207	3711.19	3874.99	3699.39	3109.58	3956.83	4692.09	3695.92	6182.99	2043.42	2669.18	1695.69	1855.31	2718.23	2470.06	2444.82	2389.24
ath-miR159c	miRNA	MIMAT0001015	29.2776	39.417	34.0304	26.2668	9.22337	25.4237	7.45646	50.6875	15.5265	20.5181	5.44654	20.5478	8.8197	16.3867	10.4872	12.7938
ath-miR161.1	miRNA	MIMAT0000181	16208.7	15975.4	21529.9	21096.3	20508.2	17124.3	16468.8	16785.6	11131.2	10387.6	14331.7	13478.8	12265.6	14373.6	10333.8	17170.8
ath-miR163	miRNA	MIMAT0000184	1168.08	1295.3	1427.86	1416.38	4.61169	18.3616	4.97097	20.4529	288.253	219.47	363.103	363.345	1.76394	8.19336	11.7981	38.3813
ath-miR164c-5p	miRNA	MIMAT0001017	88.8424	83.0788	96.4195	107.088	95.3082	80.5084	39.7678	94.261	56.7055	62.6534	28.1404	39.0909	35.2788	21.6883	27.5288	49.5759
ath-miR166a-3p	miRNA	MIMAT0000189	123.168	182.531	177.242	161.642	153.723	296.61	176.47	227.649	122.187	216.173	95.3144	139.324	228.43	207.726	199.256	182.311
ath-miR167d	miRNA	MIMAT0000905	768.285	616.118	673.519	583.93	842.402	1118.64	708.364	1124.91	198.469	298.245	265.065	246.573	475.382	325.324	487.653	308.65
ath-miR168a-5p	miRNA	MIMAT0000198	831.888	946.007	811.058	818.311	528.807	618.644	502.068	753.199	1290.73	1516.87	1033.03	1343.62	1312.37	1746.15	1225.69	1221.8
ath-miR169b-5p	miRNA	MIMAT0000906	37.3542	107.942	51.0456	80.8208	75.3242	74.8587	86.992	73.8082	10.801	15.7549	20.8784	38.5897	23.8132	104.586	19.6634	31.9844
ath-miR171a-5p	miRNA	MIMAT0031888	42.402	25.4694	34.0304	28.2873	46.1169	52.2599	32.3113	40.0165	43.2042	72.9124	61.7274	57.634	53.8002	49.6421	58.9903	73.5642
ath-miR173-3p	miRNA	MIMAT0022843	78.7466	50.3324	53.8815	32.3283	47.6541	125.706	57.1662	67.5834	51.98	68.1493	47.2033	62.6457	100.545	49.1601	107.493	59.1712
ath-miR173-5p	miRNA	MIMAT0000206	109.034	75.8019	87.9119	56.5746	86.0848	101.695	106.876	92.4825	25.6525	27.1132	49.9266	46.6084	47.6264	56.8715	36.7051	30.3852
ath-miR1886.1	miRNA	MIMAT0007853	81.7754	63.0672	92.1657	141.436	75.3242	70.6214	114.332	67.5834	98.5596	83.5379	118.916	111.76	67.0297	57.8355	60.3012	67.1673
ath-miR319a	miRNA	MIMAT0000511	755.16	941.762	689.116	836.495	1136.01	1524.01	1205.46	1483.28	341.583	457.626	308.637	405.443	646.484	1063.21	722.303	607.704
ath-miR319c	miRNA	MIMAT0001016	157.493	167.371	141.793	185.888	190.616	218.926	136.702	221.424	31.053	47.6312	52.6499	50.1166	58.21	64.5829	79.9646	47.9766
ath-miR396b-5p	miRNA	MIMAT0000945	1879.82	2240.7	2281.46	2374.11	1867.73	1807.91	1782.09	1775.84	2593.6	3333.82	2809.51	3436.49	3197.14	2809.84	2052.86	1807.12
ath-miR399c-3p	miRNA	MIMAT0000953	36.3446	54.5773	55.2994	60.6156	38.4307	32.4859	24.8549	32.0132	57.3806	63.0198	88.9601	73.1702	40.5706	40.4848	39.3269	41.5797
ath-miR403-3p	miRNA	MIMAT0001004	1980.78	1825.31	1802.19	1798.26	2310.46	1786.72	2714.15	1769.62	1261.02	1234.75	1847.28	1567.14	1634.29	1633.85	1961.1	1773.54
ath-miR408-5p	miRNA	MIMAT0031915	262.489	226.799	309.11	323.283	590.296	788.135	685.994	459.745	178.892	200.784	210.599	147.343	422.464	375.93	474.544	676.47
ath-miR5651	miRNA	MIMAT0022422	29.2776	19.4053	24.1049	22.2257	10.7606	4.23729	17.3984	10.6711	18.9018	10.259	17.2474	20.0466	14.1115	14.4589	11.7981	11.1945
ath-miR5654-3p	miRNA	MIMAT0023005	33.3159	35.1721	52.4636	64.6566	26.1329	36.7231	29.8258	56.9123	38.4787	36.273	41.7568	30.0699	23.8132	24.5801	27.5288	25.5875
ath-miR5663-3p	miRNA	MIMAT0032129	15.1436	6.67056	9.92554	4.04104	10.7606	7.06214	9.94195	3.55702	14.1764	14.2894	13.6163	12.5291	8.8197	12.0491	10.4872	19.1907
ath-miR773a	miRNA	MIMAT0003932	224.125	226.799	218.362	163.662	328.967	396.892	323.113	469.527	128.937	229.729	154.319	163.38	347.496	383.642	289.708	228.689
ath-miR779.2	miRNA	MIMAT0004329	17.1627	13.3411	14.1793	14.1436	15.3723	14.1243	14.9129	10.6711	15.5265	14.6558	19.9706	19.0443	8.8197	8.67532	11.7981	15.9922
ath-miR824-5p	miRNA	MIMAT0004277	102.976	95.2071	77.9864	103.047	121.441	112.994	141.673	110.268	23.6273	43.9673	42.6645	56.6317	50.2723	54.9437	36.7051	23.9883
ath-miR837-5p	miRNA	MIMAT0004258	16.1532	31.5336	39.7022	22.2257	24.5957	14.1243	22.3694	13.3388	35.1034	24.5484	24.5094	35.0816	28.223	26.9899	30.1506	25.5875
ath-miR842	miRNA	MIMAT0004264	20.1914	33.9592	14.1793	22.2257	18.4467	11.2994	27.3404	14.2281	6.07559	6.2287	6.35429	9.02098	14.1115	15.9048	14.4198	14.393
ath-miR846-5p	miRNA	MIMAT0032023	49.469	32.7464	51.0456	54.554	55.3402	36.7231	54.6807	43.5735	71.5569	36.6394	95.3144	69.662	65.2658	59.2813	123.224	110.346
ath-miR858b	miRNA	MIMAT0022417	17.1627	26.6823	15.5973	14.1436	30.7446	9.887	19.8839	22.2314	6.75065	8.06067	3.63103	8.51981	6.17379	24.5801	3.93269	14.393
ath-miR865-5p	miRNA	MIMAT0004313	26.2489	21.8309	18.4331	14.1436	18.4467	19.774	9.94195	11.5603	29.7029	22.35	30.8637	26.5618	25.5771	22.6522	49.814	49.5759

## Sheet: excluded miRNA star
MIR ID	mir/precursor	MI ID2	LL1	LL2	LL3	LL4	LL5	LL6	LL7	LL8	LL9	LL10	LL11	LL12	LL13	LL14	LL15	LL16
ath-miR156b-5p*	miRNA	MIMAT0000167	9.08615	20.0117	14.1793	14.1436	27.6701	7.06214	19.8839	18.6744	9.45092	15.3886	18.1551	17.5408	14.9935	20.2424	5.24358	27.1868
ath-miR157b-3p*	miRNA	MIMAT0031871	49.469	45.4811	31.1945	34.3488	16.9095	18.3616	47.2243	26.6776	282.177	407.43	336.778	539.254	203.735	2199.68	184.836	305.451
ath-miR159b-5p*	miRNA	MIMAT0031889	1.00957	2.42566	2.83587	2.02052	1.53723	1.41243	14.9129	0.889255	28.3527	17.5869	22.6939	24.5571	32.6329	32.2915	30.1506	38.3813
ath-miR167a-3p*	miRNA	MIMAT0031883	4.03829	4.85132	1.41793	6.06156	4.61169	4.23729	2.48549	0	46.5795	82.4387	65.3585	78.1818	26.4591	57.3535	43.2595	15.9922
ath-miR168a-3p*	miRNA	MIMAT0031884	3.02872	9.70264	4.2538	14.1436	4.61169	2.82486	7.45646	6.22478	61.431	101.125	105.3	125.291	68.7937	108.441	76.0319	110.346
ath-miR393a-3p*	miRNA	MIMAT0031905	20.1914	14.554	19.8511	20.2052	6.14892	19.774	12.4274	21.3421	24.3024	15.0222	24.5094	23.5548	34.3968	35.1832	60.3012	25.5875
ath-miR393b-3p*	miRNA	MIMAT0031906	21.201	25.4694	15.5973	28.2873	15.3723	33.8983	24.8549	41.795	42.5291	39.2042	33.587	24.0559	53.8002	62.6551	69.4775	25.5875
ath-miR396b-3p*	miRNA	MIMAT0031909	21.201	10.9155	11.3435	8.08208	16.9095	14.1243	9.94195	21.3421	8.77585	12.091	14.5241	15.5361	22.9312	28.4358	18.3525	35.1829
ath-miR397a*	miRNA	MIMAT0000946	13.1244	6.06415	5.67174	12.1231	12.2978	11.2994	14.9129	10.6711	4.72546	2.19836	3.63103	5.01166	15.8755	6.26551	13.109	9.59533
ath-miR399c-5p*	miRNA	MIMAT0031913	0	3.03207	1.41793	8.08208	0	0	0	0.889255	89.1086	106.254	29.0482	59.1375	29.105	16.3867	17.0416	11.1945
ath-miR403-5p*	miRNA	MIMAT0031914	16.1532	16.3732	18.4331	14.1436	13.8351	9.887	27.3404	10.6711	14.8514	11.3582	15.4319	15.035	9.70167	20.2424	9.17627	4.79766
ath-miR775*	miRNA	MIMAT0003934	3.02872	10.3091	11.3435	10.1026	9.22337	14.1243	4.97097	12.4496	9.45092	4.76312	9.07756	10.0233	18.5214	13.4949	6.55448	4.79766
ath-miR846-3p*	miRNA	MIMAT0004269	10.0957	23.0438	12.7614	30.3078	27.6701	12.7119	47.2243	32.9024	14.1764	13.1902	11.8008	18.5431	24.6952	29.3997	11.7981	22.3891

## Sheet: excluded duplicates
MIR ID	mir/precursor	MI ID2	LL1	LL2	LL3	LL4	LL5	LL6	LL7	LL8	LL9	LL10	LL11	LL12	LL13	LL14	LL15	LL16
ath-miR161.2	miRNA	MIMAT0006779	16208.7	15975.4	21529.9	21096.3	20508.2	17124.3	16468.8	16785.6	11131.2	10387.6	14330.7	13478.8	12265.6	14373.1	10333.8	17170.8
ath-miR1886.2	miRNA	MIMAT0012129	81.7754	63.0672	92.1657	141.436	75.3242	70.6214	114.332	67.5834	98.5596	83.5379	118.916	111.76	67.0297	57.8355	60.3012	67.1673

## Sheet: excluded miRNAs detection based
MIR ID	mir/precursor	MI ID2	LL1	LL2	LL3	LL4	LL5	LL6	LL7	LL8	LL9	LL10	LL11	LL12	LL13	LL14	LL15	LL16
ath-miR156f-5p	miRNA	MIMAT0000171	0	0	0	0	6.14892	1.41243	0	1.77851	0.675065	2.56476	1.81551	0.501166	0	1.44589	1.3109	0
ath-miR160a-5p	miRNA	MIMAT0000178	2.01914	8.48981	9.92554	6.06156	6.14892	8.47457	17.3984	10.6711	9.45092	8.06067	1.81551	5.01166	4.40985	4.81962	0	4.79766
ath-miR160b	miRNA	MIMAT0000179	1.00957	7.27698	4.2538	2.02052	9.22337	4.23729	4.97097	7.11404	3.37533	3.66394	1.81551	2.00466	3.52788	2.40981	3.93269	1.59922
ath-miR164b-3p	miRNA	MIMAT0031878	0	0.606415	0	0	0	1.41243	0	0	4.05039	1.09918	0.907756	6.51515	5.29182	4.81962	3.93269	0
ath-miR164b-5p	miRNA	MIMAT0000186	3.02872	1.81924	0	0	1.53723	0	0	0	3.37533	1.46558	0.907756	0	2.64591	0.963924	0	0
ath-miR167a-5p	miRNA	MIMAT0000196	10.0957	7.27698	7.08967	0	7.68615	2.82486	9.94195	8.00329	2.0252	4.76312	2.72327	4.51049	1.76394	3.37374	1.3109	3.19844
ath-miR167b	miRNA	MIMAT0000197	11.1053	11.5219	15.5973	4.04104	7.68615	8.47457	2.48549	15.1173	0.675065	8.06067	4.53878	5.01166	3.52788	4.33766	1.3109	4.79766
ath-miR169b-3p	miRNA	MIMAT0031897	1.00957	0.606415	2.83587	6.06156	0	2.82486	0	4.44627	2.70026	4.03034	3.63103	5.51282	5.29182	6.74747	3.93269	0
ath-miR169e	miRNA	MIMAT0000909	1.00957	16.3732	11.3435	6.06156	0	2.82486	0	6.22478	0	0.366394	2.72327	0.501166	0.88197	1.92785	0	3.19844
ath-miR172e-5p	miRNA	MIMAT0031918	0	0	1.41793	2.02052	1.53723	0	2.48549	0	3.37533	4.03034	4.53878	6.51515	1.76394	42.8946	5.24358	3.19844
ath-miR1886.3	miRNA	MIMAT0013773	1.00957	3.03207	1.41793	0	3.07446	7.06214	7.45646	2.66776	0	0.366394	1.81551	1.5035	0.88197	1.44589	0	1.59922
ath-miR1888a	miRNA	MIMAT0007855	7.06701	4.85132	1.41793	0	6.14892	7.06214	4.97097	1.77851	2.0252	4.03034	0	4.00932	1.76394	1.92785	3.93269	11.1945
ath-miR1888b	miRNA	MIMAT0022436	3.02872	1.81924	0	0	1.53723	0	0	0	2.0252	0.366394	0.907756	3.50816	1.76394	0.481962	0	1.59922
ath-miR3440b-3p	miRNA	MIMAT0017946	1.00957	0	0	4.04104	0	1.41243	0	0	0	3.29755	0	1.5035	0.88197	0.481962	1.3109	0
ath-miR390a-3p	miRNA	MIMAT0031902	0	1.81924	0	0	0	2.82486	0	2.66776	1.35013	2.19836	2.72327	3.50816	1.76394	9.15728	7.86537	1.59922
ath-miR390a-5p	miRNA	MIMAT0000931	0	1.21283	4.2538	6.06156	1.53723	0	2.48549	3.55702	0	1.83197	0	0.501166	2.64591	2.40981	0	4.79766
ath-miR390b-3p	miRNA	MIMAT0031903	2.01914	0.606415	0	0	4.61169	1.41243	7.45646	1.77851	0	0.366394	0.907756	0.501166	1.76394	13.9769	6.55448	7.9961
ath-miR391-5p	miRNA	MIMAT0000933	2.01914	3.63849	2.83587	4.04104	0	1.41243	2.48549	1.77851	1.35013	1.09918	0	1.00233	1.76394	0.481962	1.3109	1.59922
ath-miR399a	miRNA	MIMAT0000951	1.00957	1.21283	4.2538	0	0	0	0	0	0.675065	1.83197	0.907756	1.5035	0	0.481962	0	0
ath-miR399f	miRNA	MIMAT0000956	4.03829	9.09622	15.5973	8.08208	0	2.82486	0	0	54.0052	24.182	30.8637	34.0793	0	0.963924	0	6.39688
ath-miR402	miRNA	MIMAT0001003	8.07658	3.03207	4.2538	8.08208	6.14892	4.23729	9.94195	7.11404	1.35013	0.366394	0	0.501166	0	1.92785	0	1.59922
ath-miR408-3p	miRNA	MIMAT0001011	3.02872	5.45773	9.92554	8.08208	13.8351	16.9491	19.8839	8.89255	1.35013	2.56476	5.44654	3.00699	23.8132	7.22943	14.4198	11.1945
ath-miR4228-3p	miRNA	MIMAT0032109	2.01914	4.2449	4.2538	2.02052	3.07446	2.82486	2.48549	4.44627	8.10079	9.15985	6.35429	4.51049	12.3476	10.6032	9.17627	9.59533
ath-miR4228-5p	miRNA	MIMAT0017944	1.00957	0.606415	0	2.02052	0	0	2.48549	0	0.675065	1.46558	1.81551	4.00932	0.88197	2.89177	0	0
ath-miR5024-5p	miRNA	MIMAT0020530	2.01914	3.03207	4.2538	4.04104	3.07446	2.82486	2.48549	0	0.675065	2.56476	3.63103	2.50583	0.88197	2.89177	2.62179	0
ath-miR5026	miRNA	MIMAT0020532	3.02872	0	0	0	0	0	0	0	0	4.03034	2.72327	1.5035	1.76394	0.963924	1.3109	3.19844
ath-miR5595a	miRNA	MIMAT0023517	8.07658	4.2449	4.2538	0	7.68615	8.47457	4.97097	2.66776	8.10079	3.66394	9.98532	5.01166	6.17379	4.33766	3.93269	15.9922
ath-miR5644	miRNA	MIMAT0022406	2.01914	0.606415	1.41793	4.04104	4.61169	2.82486	0	1.77851	1.35013	2.19836	0.907756	2.00466	0.88197	0.963924	1.3109	1.59922
ath-miR5650	miRNA	MIMAT0022416	12.1149	15.7668	2.83587	6.06156	4.61169	1.41243	4.97097	3.55702	22.2772	12.8238	11.8008	19.5455	1.76394	5.30158	2.62179	6.39688
ath-miR5652	miRNA	MIMAT0022424	2.01914	6.67056	4.2538	4.04104	10.7606	0	4.97097	0.889255	0	4.39673	2.72327	4.00932	1.76394	5.30158	6.55448	0
ath-miR5654-5p	miRNA	MIMAT0022426	0	5.45773	1.41793	0	1.53723	2.82486	4.97097	3.55702	0.675065	1.83197	0.907756	1.00233	1.76394	2.89177	0	0
ath-miR5656	miRNA	MIMAT0022429	2.01914	1.21283	1.41793	2.02052	1.53723	8.47457	4.97097	1.77851	1.35013	0.732788	1.81551	2.50583	0	2.89177	5.24358	1.59922
ath-miR5995b	miRNA	MIMAT0023518	2.01914	2.42566	1.41793	4.04104	0	4.23729	2.48549	0	4.05039	0.366394	0.907756	2.50583	1.76394	2.40981	2.62179	4.79766
ath-miR5997	miRNA	MIMAT0023520	0	4.2449	0	2.02052	3.07446	4.23729	0	0	0	0	0	2.00466	2.64591	0.963924	5.24358	3.19844
ath-miR5998a	miRNA	MIMAT0023521	3.02872	0.606415	0	0	0	0	0	0.889255	1.35013	0.732788	3.63103	1.5035	0.88197	0.481962	0	3.19844
ath-miR777	miRNA	MIMAT0003936	1.00957	7.88339	1.41793	6.06156	3.07446	7.06214	7.45646	5.33553	0.675065	2.93115	6.35429	4.51049	5.29182	3.37374	0	1.59922
ath-miR779.1	miRNA	MIMAT0003938	2.01914	1.81924	0	4.04104	0	1.41243	2.48549	1.77851	11.4761	10.9918	13.6163	13.0303	4.40985	5.30158	5.24358	9.59533
ath-miR781a	miRNA	MIMAT0003940	3.02872	9.70264	1.41793	4.04104	0	4.23729	0	7.11404	0	2.93115	0.907756	3.00699	0	0.963924	1.3109	3.19844
ath-miR8176	miRNA	MIMAT0032775	2.01914	1.21283	0	2.02052	0	2.82486	0	1.77851	4.05039	1.46558	3.63103	1.5035	0.88197	4.81962	1.3109	7.9961
ath-miR824-3p	miRNA	MIMAT0032024	0	4.2449	2.83587	6.06156	6.14892	1.41243	2.48549	1.77851	13.5013	20.8845	19.0629	29.5688	14.1115	62.6551	6.55448	30.3852
ath-miR825	miRNA	MIMAT0004241	2.01914	1.21283	1.41793	10.1026	3.07446	1.41243	0	0	0.675065	2.56476	3.63103	1.5035	0	0.963924	0	0
ath-miR833a-5p	miRNA	MIMAT0004252	4.03829	6.06415	4.2538	2.02052	0	0	0	0.889255	4.05039	5.49591	4.53878	5.51282	0.88197	0.481962	0	1.59922
ath-miR837-3p	miRNA	MIMAT0004259	23.2202	7.88339	15.5973	16.1642	12.2978	14.1243	7.45646	4.44627	9.45092	19.4189	6.35429	8.01865	7.93773	10.1212	7.86537	6.39688
ath-miR841b-3p	miRNA	MIMAT0017742	2.01914	1.21283	0	8.08208	3.07446	1.41243	0	0	0.675065	2.19836	2.72327	0	3.52788	3.37374	0	1.59922
ath-miR841b-5p	miRNA	MIMAT0017741	0	0	7.08967	2.02052	0	1.41243	0	0.889255	0.675065	1.83197	2.72327	2.00466	1.76394	0.963924	0	0
ath-miR843	miRNA	MIMAT0004265	6.05743	3.63849	1.41793	2.02052	6.14892	2.82486	2.48549	1.77851	10.801	8.79346	4.53878	7.01632	7.93773	4.33766	14.4198	9.59533
ath-miR847	miRNA	MIMAT0004278	12.1149	6.67056	2.83587	8.08208	0	2.82486	0	0	4.72546	6.96149	9.07756	6.51515	0	0	0	0
ath-miR850	miRNA	MIMAT0004272	0	0.606415	1.41793	0	0	2.82486	0	1.77851	3.37533	1.46558	5.44654	0.501166	0.88197	0	0	0
ath-miR852	miRNA	MIMAT0004275	1.00957	1.21283	0	0	1.53723	4.23729	4.97097	3.55702	2.70026	3.66394	4.53878	2.50583	0	2.40981	0	0
ath-miR853	miRNA	MIMAT0004276	4.03829	2.42566	4.2538	2.02052	4.61169	1.41243	9.94195	1.77851	4.05039	2.56476	0.907756	0.501166	1.76394	0.481962	3.93269	1.59922
ath-miR862-5p	miRNA	MIMAT0004307	4.03829	1.21283	1.41793	4.04104	3.07446	2.82486	0	0.889255	3.37533	3.29755	4.53878	6.01399	4.40985	2.40981	2.62179	6.39688
ath-miR863-5p	miRNA	MIMAT0004309	2.01914	1.21283	5.67174	0	10.7606	0	2.48549	2.66776	0	1.46558	0	0	0.88197	0	0	0
ath-miR864-5p	miRNA	MIMAT0004311	5.04786	1.81924	9.92554	12.1231	0	0	4.97097	0	2.0252	1.09918	3.63103	1.5035	0	0.481962	1.3109	0
ath-miR865-3p	miRNA	MIMAT0004314	0	1.81924	0	4.04104	3.07446	5.64971	0	4.44627	2.0252	2.56476	4.53878	2.50583	1.76394	2.40981	1.3109	3.19844
